# Supplementary material for: Visual self-motion cues are impaired yet overweighted during visual–vestibular integration in Parkinson’s disease
Source: PubMed Central journal article supplement — Brain Commun. 2020 Mar 31;2(1):fcaa035. doi: 10.1093/braincomms/fcaa035 (PMC7425426; doi:10.1093/braincomms/fcaa035), 2020-03-31
Supplement: fcaa035_supplementary_data.pdf [file fcaa035_supplementary_data.pdf]

**Supplementary Table 1: Parkinson's disease participants' details**

| Subject ID       | Age (years)       | Gender        | MoCA              | TUG <sub>1</sub> (s) | TUG <sub>2</sub> (s) | First symptom | Side of first symptom | Disease duration (years) | Levodopa initiation (year) | LEDD (mg/day)    | Motor UPDRS ON    | Motor UPDRS OFF    |
|------------------|-------------------|---------------|-------------------|----------------------|----------------------|---------------|-----------------------|--------------------------|----------------------------|------------------|-------------------|--------------------|
| PD1              | 60                | M             | 27                | 17.9                 | 15.8                 | Hand tremor   | Right                 | 3                        | NA                         | 100              | 18                | 18                 |
| PD2              | 52                | M             | 29                | 24.5                 | 14.2                 | Hand slowness | Left                  | 1                        | NA                         | 100              | 28                | 28                 |
| PD3              | 56                | F             | 30                | 22.4                 | 16.8                 | Hand tremor   | Right                 | 3                        | NA                         | 150              | 6                 | 6                  |
| PD4              | 75                | M             | 28                | 28.4                 | 13.6                 | Gait slowness | Bilateral             | 6                        | NA                         | 150              | 19                | 19                 |
| PD5              | 53                | M             | 28                | 13.8                 | 13.1                 | Hand tremor   | Right                 | 3                        | NA                         | 175              | 11                | 11                 |
| PD6              | 62                | F             | 29                | 14.5                 | 14.0                 | Hand slowness | Left                  | 4                        | NA                         | 180              | 26                | 26                 |
| PD7              | 65                | M             | 24                | 11.6                 | 11.0                 | Hand tremor   | Left                  | 2                        | NA                         | 200              | 8                 | 8                  |
| PD8              | 56                | F             | 24                | 13.5                 | 11.7                 | Handwriting   | Right                 | 3                        | 2017                       | 287.5            | 30                | 26                 |
| PD9              | 55                | M             | 24                | 12.1                 | 18.8                 | Hand slowness | Left                  | 5                        | NA                         | 300              | 15                | 32                 |
| PD10             | 55                | M             | 28                | 12.4                 | 14.1                 | Hand tremor   | Right                 | 4                        | NA                         | 300              | 16                | 16                 |
| PD11             | 66                | F             | 25                | 11.3                 | 10.5                 | Leg tremor    | Left                  | 6                        | NA                         | 325              | 19                | 19                 |
| PD12             | 71                | M             | 25                | 11.8                 | 11.4                 | Hand tremor   | Right                 | 5                        | NA                         | 400              | 38                | 50                 |
| PD13             | 78                | F             | 26                | 12.4                 | 14.5                 | Jaw tremor    | Bilateral             | 2                        | 2016                       | 550              | 11                | 11                 |
| PD14             | 67                | M             | 24                | 11.7                 | 11.8                 | Hand tremor   | Left                  | 4                        | NA                         | 550              | 16                | 13                 |
| PD15             | 71                | M             | 19                | 11.8                 | 11.5                 | Hand tremor   | Left                  | 8                        | NA                         | 550              | 34                | 34                 |
| PD16             | 66                | M             | 26                | 12.7                 | 12.6                 | Hand slowness | Right                 | 3                        | NA                         | 600              | 29                | 29                 |
| PD17             | 71                | M             | 30                | 12.5                 | 13.4                 | Hand tremor   | Left                  | 13                       | 2012                       | 700              | 37                | 40                 |
| PD18             | 72                | M             | 26                | 15.2                 | 20.5                 | Hand slowness | Left                  | 11                       | 2014                       | 1048             | 26                | 46                 |
| PD19             | 72                | F             | 19                | 13.2                 | 16.2                 | Leg tremor    | Right                 | 5                        | 2016                       | 1200             | 20                | 32                 |
| <b>Mean ± SD</b> | <b>64.4 ± 8.0</b> | <b>13M:6F</b> | <b>25.8 ± 3.1</b> | <b>14.9 ± 4.9</b>    | <b>14.0 ± 2.7</b>    |               |                       | <b>4.8 ± 3.0</b>         |                            | <b>414 ± 311</b> | <b>21.4 ± 9.6</b> | <b>24.4 ± 12.6</b> |

MoCA: Montreal cognitive assessment (range 0 to 30, higher scores reflect better cognition); TUG<sub>1</sub>: timed up and go, visit 1; TUG<sub>2</sub>: timed up and go, visit 2; UPDRS: Unified Parkinson's Disease Rating Scale (motor part, range 0 to 108, higher scores reflects more severe motor symptoms); LEDD: levodopa equivalent daily dose (Tomlinson *et al.*, 2010).

**Supplementary Table 2: Age-matched control participants' details**

| <b>Subject ID</b> | <b>Age (years)</b> | <b>Gender</b> | <b>MoCA</b>       | <b>TUG<sub>1</sub> (s)</b> | <b>TUG<sub>2</sub> (s)</b> |
|-------------------|--------------------|---------------|-------------------|----------------------------|----------------------------|
| AMC1              | 62                 | F             | 25                | 11.7                       | 10.9                       |
| AMC2              | 49.5               | M             | 26                | 10.7                       | 11.7                       |
| AMC3              | 64                 | M             | 22                | 11.9                       | NA                         |
| AMC4              | 65                 | F             | 28                | 10.6                       | 11.4                       |
| AMC5              | 59                 | F             | 23                | 12.2                       | 19.3                       |
| AMC6              | 72                 | M             | 22                | 14.9                       | 13.6                       |
| AMC7              | 70                 | M             | 22                | 13.0                       | 23.7                       |
| AMC8              | 65.5               | M             | 25                | 15.2                       | 12.7                       |
| AMC9              | 70                 | F             | 20                | 12.8                       | 12.4                       |
| AMC10             | 57                 | M             | 27                | 10.1                       | 9.2                        |
| AMC11             | 65                 | M             | 26                | 9.6                        | 9.8                        |
| AMC12             | 56                 | F             | 25                | 16.7                       | 15.8                       |
| AMC13             | 68                 | F             | 24                | 14.6                       | 14.6                       |
| AMC14             | 68.5               | M             | 26                | 10.3                       | 11.4                       |
| AMC15             | 63                 | M             | 23                | 9.0                        | 10.5                       |
| AMC16             | 63.5               | M             | 25                | 12.3                       | 14.0                       |
| AMC17             | 53                 | M             | 28                | 14.6                       | 13.2                       |
| AMC18             | 70                 | M             | 25                | 9.6                        | 10.4                       |
| AMC19             | 66                 | M             | 21                | 11.4                       | 9.2                        |
| AMC20             | 53                 | F             | 29                | 17.6                       | 10.8                       |
| AMC21             | 49                 | F             | 25                | 14.0                       | 11.6                       |
| AMC22             | 64                 | M             | 24                | 13.6                       | 10.7                       |
| AMC23             | 70                 | M             | 23                | 12.8                       | 12.0                       |
| <b>Mean ± SD</b>  | <b>62.7 ± 6.9</b>  | <b>15M:8F</b> | <b>24.5 ± 2.3</b> | <b>12.6 ± 2.3</b>          | <b>12.7 ± 3.4</b>          |

MoCA: Montreal cognitive assessment (range 0 to 30, higher scores reflect better cognition);

TUG<sub>1</sub>: timed up and go, visit 1; TUG<sub>2</sub>: timed up and go, visit 2; AMC: age-matched control.

**Supplementary Table 3: Young control participants' details**

| <b>Subject ID</b> | <b>Age (years)</b> | <b>Gender</b>  | <b>MoCA</b>       | <b>TUG (s)</b>    |
|-------------------|--------------------|----------------|-------------------|-------------------|
| YC1               | 19                 | M              | 29                | 10.3              |
| YC2               | 21                 | F              | 28                | 10.4              |
| YC3               | 29                 | F              | 29                | 8.0               |
| YC4               | 19                 | M              | 25                | 12.4              |
| YC5               | 20                 | F              | 30                | 13.2              |
| YC6               | 24                 | M              | 25                | 12.7              |
| YC7               | 26                 | F              | 27                | 10.0              |
| YC8               | 24                 | M              | 28                | 18.2              |
| YC9               | 25                 | M              | 27                | 12.5              |
| YC10              | 25                 | F              | 27                | 12.0              |
| YC11              | 23                 | F              | 27                | 11.6              |
| YC12              | 23                 | F              | 25                | 13.0              |
| YC13              | 26                 | M              | 27                | 12.2              |
| YC14              | 27                 | F              | 28                | 12.3              |
| YC15              | 28                 | M              | 27                | 9.2               |
| YC16              | 21                 | F              | 30                | 10.8              |
| YC17              | 20                 | M              | 29                | 13.8              |
| YC18              | 24                 | M              | 28                | 13.2              |
| YC19              | 26                 | F              | 27                | 22.7              |
| YC20              | 27                 | M              | 27                | 20.8              |
| <b>Mean ± SD</b>  | <b>23.9 ± 3.0</b>  | <b>10M:10F</b> | <b>27.5 ± 1.5</b> | <b>13.0 ± 3.5</b> |

MoCA: Montreal cognitive assessment (range 0 to 30, higher scores reflect better cognition);

TUG: timed up and go; YC: young control.
